# Supplementary material for: Design of MoS2 edge-anchored single-atom catalysts for propane dehydrogenation driven by DFT and microkinetic modeling
Source: Royal Society of Chemistry journal article supplement (doi:10.1039/d3cp05197h), 2024-01-01
Supplement: d3cp05197h1.pdf [file d3cp05197h1.pdf]

# **Design of MoS<sub>2</sub> Edge-Anchored Single-Atom Catalysts for Propane Dehydrogenation Driven by DFT and Microkinetic Model**

Chunguang Dong,<sup>†</sup> Zhuangzhuang Lai,<sup>†</sup> P. Hu, Haifeng Wang\*

*State Key Laboratory of Green Chemical Engineering and Industrial Catalysis, Centre for Computational Chemistry and Research Institute of Industrial Catalysis, School of Chemistry and Molecular Engineering, East China University of Science and Technology, Shanghai, 200237, P. R. China.*

<sup>†</sup>*C. Dong and Z. Lai contributed equally to this work.*

**Table S1.** Converge Test of  $k$ -points sampling using Sc<sub>1</sub>-S<sub>4</sub>/edge as an example

| $k$ -mesh | $E$ /eV |
|-----------|---------|
| 1×2×1     | -257.42 |
| 1×3×1     | -257.44 |
| 1×4×1     | -257.43 |
| 1×5×1     | -257.44 |
| 1×10×1    | -257.44 |
| 1×20×1    | -257.44 |

**Table S2.** The values of  $U - J$  parameters for DFT/PBE+ $U$  calculations

| 3d element | $U - J$ /eV |
|------------|-------------|
| Sc         | 2.11        |
| Ti         | 2.58        |
| V          | 2.72        |
| Cr         | 2.79        |
| Mn         | 3.06        |
| Fe         | 3.29        |
| Co         | 3.42        |
| Ni         | 3.40        |

### Supplementary Note 1

The anchoring site on the basal plane of MoS<sub>2</sub> is the hollow site coordinated by three S atoms. These hollow sites can be divided in two categories according to their geometry, known as the hollow-1 and hollow-2, respectively (Fig. S1a). In top view, hollow-1 site is positioned at the center of three adjacent Mo atoms, whereas the hollow-2 site is located directly above the Mo atom. The cohesive energies of each TM elements were adopted from experimental data.<sup>1</sup>

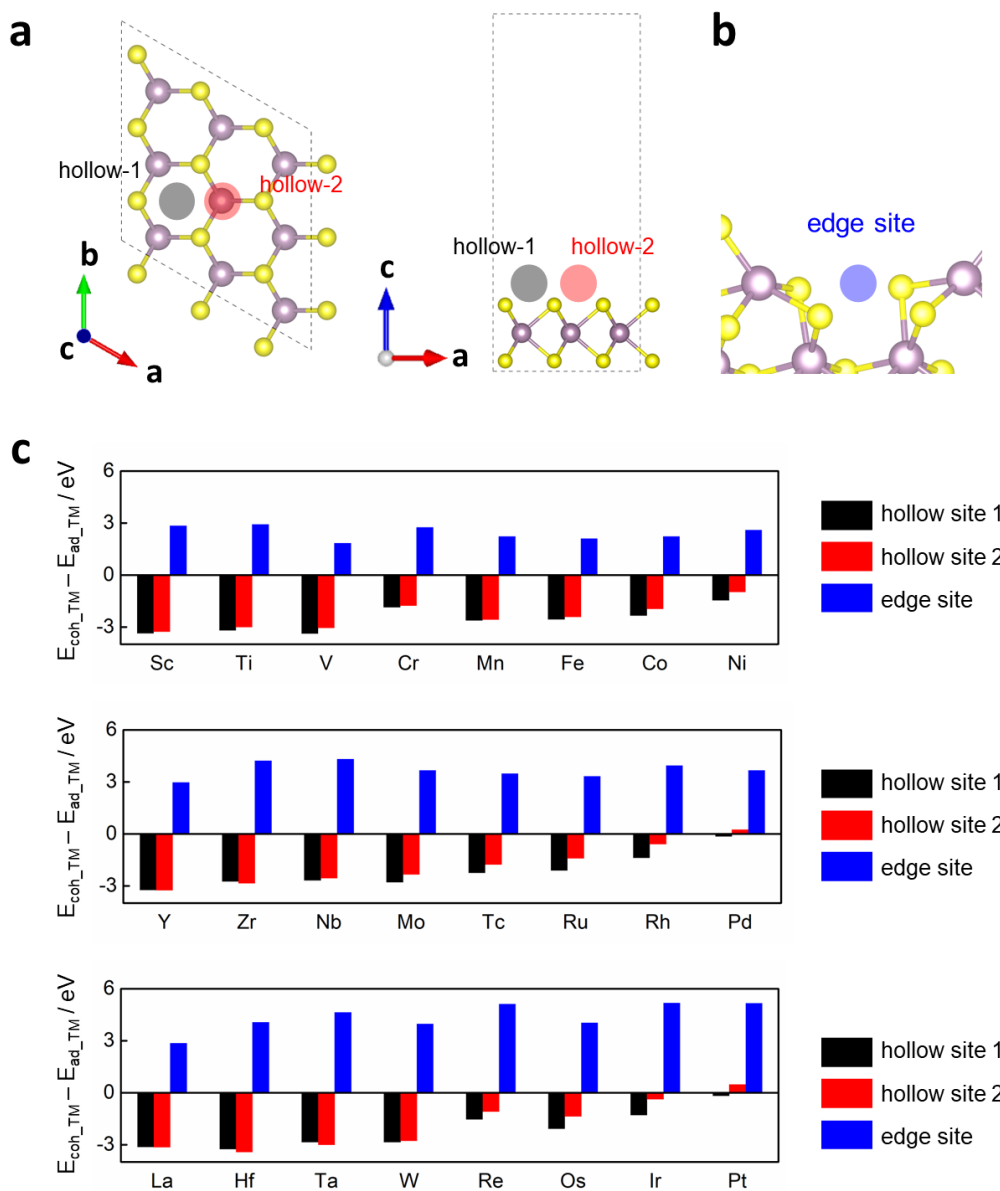

**Fig. S1.** Illustration of the structural configuration for hollow site (a) and edge site (b). (c) Thermodynamic stability ( $E_{coh\_TM} - E_{ad\_TM}$ ) of the transition metal anchored on the basal plane and edge of the monolayer MoS<sub>2</sub>, where the cohesive energies  $E_{coh\_TM}$  are obtained from experimental data.<sup>1</sup>

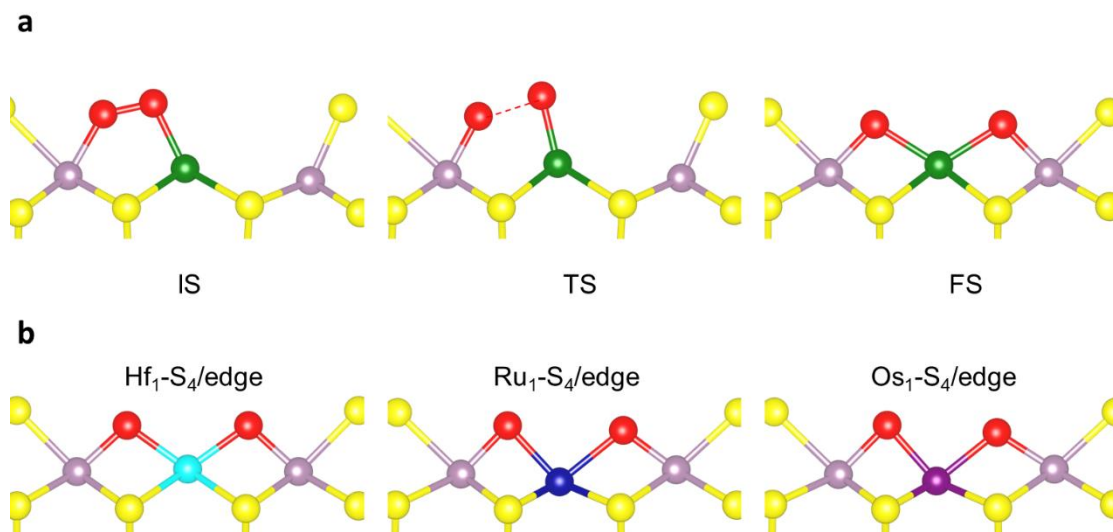

**Fig. S2.** (a) Structures of the initial state, transition state, and final state of the dissociative adsorption of an O<sub>2</sub> molecule on the TM<sub>1</sub>-S<sub>4</sub>/edge (using Sc<sub>1</sub>-S<sub>4</sub>/edge catalyst as an example). (b) Final states of dissociative adsorption of an O<sub>2</sub> molecule on the TM<sub>1</sub>-S<sub>4</sub>/edge (TM=Hf, Ru, Os) catalysts.

**Table S3.** Energy barriers ( $E_a$ ), enthalpy changes ( $\Delta H$ ), entropy-corrected energy barriers ( $G_a$ ) and Gibbs energy changes ( $\Delta G$ ) of each elementary step for the PDH reaction on the Sc<sub>1</sub>-S<sub>4</sub>/edge catalyst. (unit: eV)

| Elementary reactions                                   | $E_a$ | $\Delta H$ | $G_a$ | $\Delta G$ |
|--------------------------------------------------------|-------|------------|-------|------------|
| $C_3H_8 + * \rightarrow [C_3H_7\_H]^*$                 | 2.04  | 1.83       | 3.42  | 3.21       |
| $[C_3H_7\_H]^* \rightarrow [C_3H_6]^* + H_2$           | 0.48  | -1.47      | 0.48  | -2.81      |
| $[MoH\_SH\_C_3H_6]^* \rightarrow [C_3H_6]^* + H_2$     | 0.36  | -0.19      | 0.36  | -1.53      |
| $C_3H_8 + * \rightarrow [MoH\_C_3H_7]^*$               | 0.76  | 0.59       | 2.14  | 1.97       |
| $[MoH\_C_3H_7]^* \rightarrow [MoH\_SH\_C_3H_6]^*$      | 0.62  | -0.03      | 0.62  | -0.03      |
| $[MoH\_C_3H_7]^* \rightarrow [2MoH\_C_3H_6]^*$         | 0.71  | -0.32      | 0.71  | -0.32      |
| $[C_3H_7\_H]^* \rightarrow [MoH\_C_3H_7]^*$            | 0.10  | -1.24      | 0.10  | -1.24      |
| $[MoH\_SH]^* \rightarrow * + H_2$                      | 0.36  | 0.04       | 0.36  | -0.67      |
| $[C_3H_6]^* \rightarrow * + C_3H_6$                    | 1.22  | 1.22       | 0.03  | -0.09      |
| $[MoH\_SH\_C_3H_6]^* \rightarrow [MoH\_SH]^* + C_3H_6$ | 1.00  | 1.00       | 0     | -0.94      |
| $[2MoH\_C_3H_6]^* \rightarrow [2MoH]^* + C_3H_6$       | 0.88  | 0.88       | 0     | -1.06      |
| $[2MoH]^* \rightarrow * + H_2$                         | 0.44  | 0.44       | 0     | -0.27      |

**Table S4.** Key kinetic data for PDH reaction on Sc<sub>1</sub>-S<sub>4</sub>/edge catalyst along all pathways: the reaction rates, reversibilities and degree of rate control for each elementary step.

| Elementary reactions                                   | Reaction rate          | Reversibility         | Degree of rate control |
|--------------------------------------------------------|------------------------|-----------------------|------------------------|
| $C_3H_8 + * \rightarrow [C_3H_7\_H]^*$                 | $3.62 \times 10^{-9}$  | $3.94 \times 10^{-7}$ | $1.43 \times 10^{-9}$  |
| $[C_3H_7\_H]^* \rightarrow [C_3H_6]^* + H_2$           | $1.21 \times 10^{-8}$  | $5.08 \times 10^{-7}$ | $5.20 \times 10^{-7}$  |
| $[MoH\_SH\_C_3H_6]^* \rightarrow [C_3H_6]^* + H_2$     | $1.68 \times 10^{-4}$  | $2.53 \times 10^{-3}$ | $1.64 \times 10^{-6}$  |
| $C_3H_8 + * \rightarrow [MoH\_C_3H_7]^*$               | $2.31 \times 10^{-2}$  | $9.96 \times 10^{-1}$ | $3.95 \times 10^{-3}$  |
| $[MoH\_C_3H_7]^* \rightarrow [MoH\_SH\_C_3H_6]^*$      | $1.76 \times 10^{-2}$  | $2.28 \times 10^{-4}$ | $7.58 \times 10^{-1}$  |
| $[MoH\_C_3H_7]^* \rightarrow [2MoH\_C_3H_6]^*$         | $5.51 \times 10^{-3}$  | $2.25 \times 10^{-6}$ | $2.38 \times 10^{-1}$  |
| $[C_3H_7\_H]^* \rightarrow [MoH\_C_3H_7]^*$            | $-8.48 \times 10^{-9}$ | 1.00                  | $1.90 \times 10^{-9}$  |
| $[MoH\_SH]^* \rightarrow * + H_2$                      | $1.74 \times 10^{-2}$  | 1.00                  | $5.01 \times 10^{-12}$ |
| $[C_3H_6]^* \rightarrow * + C_3H_6$                    | $1.68 \times 10^{-4}$  | 1.00                  | $8.95 \times 10^{-18}$ |
| $[MoH\_SH\_C_3H_6]^* \rightarrow [MoH\_SH]^* + C_3H_6$ | $1.74 \times 10^{-2}$  | $2.70 \times 10^{-3}$ | $1.74 \times 10^{-4}$  |
| $[2MoH\_C_3H_6]^* \rightarrow [2MoH]^* + C_3H_6$       | $5.51 \times 10^{-3}$  | $2.40 \times 10^{-1}$ | $4.06 \times 10^{-7}$  |
| $[2MoH]^* \rightarrow * + H_2$                         | $5.51 \times 10^{-3}$  | 1.00                  | $3.18 \times 10^{-6}$  |

**Table S5.** Coverages of all intermediates on Sc<sub>1</sub>-S<sub>4</sub>/edge catalyst at the steady state.

| species               | coverage               |
|-----------------------|------------------------|
| $[C_3H_6]^*$          | $1.71 \times 10^{-5}$  |
| $[C_3H_7\_H]^*$       | $3.15 \times 10^{-19}$ |
| $[MoH\_C_3H_7]^*$     | $2.78 \times 10^{-12}$ |
| $[MoH\_SH]^*$         | $9.03 \times 10^{-9}$  |
| $[MoH\_SH\_C_3H_6]^*$ | $9.31 \times 10^{-16}$ |
| $[2MoH]^*$            | $1.57 \times 10^{-6}$  |
| $[2MoH\_C_3H_6]^*$    | $3.87 \times 10^{-16}$ |
| *                     | 1.00                   |

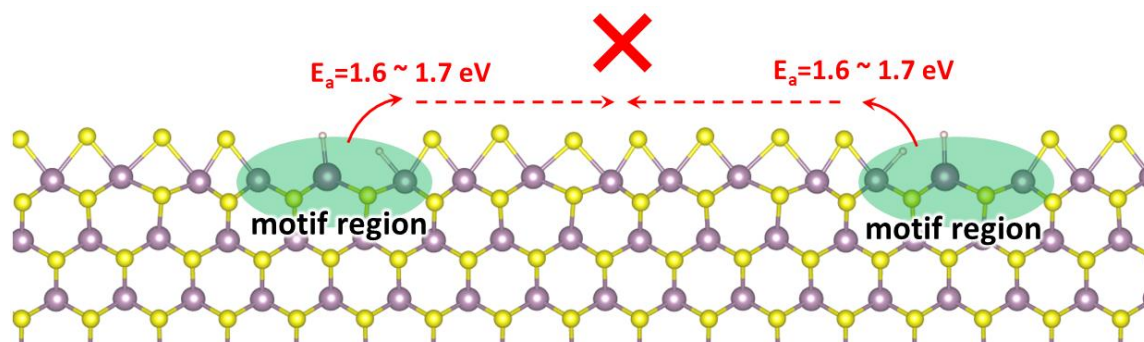

**Fig. S3.** Energy barriers of the H atom escaped from the motif region (using Sc<sub>1</sub>-S<sub>4</sub>/edge catalyst as an example).

**Table S6.** Energy barriers and enthalpy changes of each elementary reaction step along path 2 on six TM<sub>1</sub>-S<sub>4</sub>/edge. (unit: eV) The subscript *i* (*i* = 1-4) represents the process of the abstraction of  $\alpha$ -H, the abstraction of  $\beta$ -H, the desorption of the propylene, and the formation of H<sub>2</sub>, respectively.

| TM <sub>1</sub> -S <sub>4</sub> /edge | $E_{a1}$ | $\Delta H_1$ | $E_{a2}$ | $\Delta H_2$ | $\Delta H_3$ | $\Delta H_4$ |
|---------------------------------------|----------|--------------|----------|--------------|--------------|--------------|
| Sc                                    | 0.76     | 0.59         | 0.62     | -0.03        | 1.00         | 0.04         |
| Ru                                    | 0        | -0.09        | 0.71     | 0.38         | 1.04         | 0.26         |
| Rh                                    | 0.56     | 0.56         | 0.99     | 0.51         | 0.87         | -0.35        |
| Os                                    | 0        | -0.43        | 0.98     | 0.13         | 1.30         | 0.59         |
| Ir                                    | 0.14     | 0.38         | 0.93     | 0.59         | 0.48         | 0.14         |
| Pt                                    | 1.63     | 0.64         | 0.79     | 0.86         | 1.01         | -0.92        |

**Table S7.** Key kinetic data for PDH reaction on TM<sub>1</sub>-S<sub>4</sub>/edge (TM= Pt, Rh, Ir, Os, Ru) catalysts along the dominant pathways: the energy barriers of the two dehydrogenation steps, the TOF, the energy barrier of first dehydrogenation process on TM<sub>1</sub>'-S<sub>4</sub>/edge catalysts ( $E_a'$ ), and the corrected TOF (TOF') on TM<sub>1</sub>'-S<sub>4</sub>/edge (TM= Rh, Ir, Os, Ru). Note that DHS represents “dehydrogenation step”.

|                                         | Pt <sub>1</sub> -S <sub>4</sub> /edge | Rh <sub>1</sub> -S <sub>4</sub> /edge | Ir <sub>1</sub> -S <sub>4</sub> /edge | Os <sub>1</sub> -S <sub>4</sub> /edge | Ru <sub>1</sub> -S <sub>4</sub> /edge |
|-----------------------------------------|---------------------------------------|---------------------------------------|---------------------------------------|---------------------------------------|---------------------------------------|
| $E_a$ of 1 <sup>st</sup> DHS/eV         | 1.63                                  | 0.56                                  | 0.14                                  | 0                                     | 0                                     |
| $E_a$ of 2 <sup>nd</sup> DHS/eV         | 0.79                                  | 0.99                                  | 0.93                                  | 0.63                                  | 0.71                                  |
| TOF/site <sup>-1</sup> s <sup>-1</sup>  | $6.22 \times 10^{-5}$                 | $2.20 \times 10^{-4}$                 | $4.80 \times 10^{-3}$                 | 23.5                                  | 18.4                                  |
| $E_a'$ of 1 <sup>st</sup> DHS/eV        | \                                     | 0.84                                  | 0.05                                  | 0.90                                  | 1.06                                  |
| TOF'/site <sup>-1</sup> s <sup>-1</sup> | \                                     | $1.05 \times 10^{-2}$                 | $1.98 \times 10^{-2}$                 | $2.52 \times 10^{-2}$                 | $1.21 \times 10^{-1}$                 |

**Table S8.** Enthalpy changes of six screened TM<sub>1</sub>-S<sub>4</sub>/edge catalysts between two different motif configuration states ( $\Delta E = E(\text{TM}_1'\text{-S}_4/\text{edge SACs}) - E(\text{TM}_1\text{-S}_4/\text{edge SACs})$ ).

| TM <sub>1</sub> -S <sub>4</sub> /edge | Sc   | Pt   | Rh   | Ir   | Os    | Ru    |
|---------------------------------------|------|------|------|------|-------|-------|
| $\Delta E$ /eV                        | 0.32 | 0.72 | 0.30 | 0.11 | -0.63 | -0.11 |

**Table S9.** The Gibbs free energy change ( $\Delta G$ ) of the reaction between fluttered S atom and H<sub>2</sub> forming H<sub>2</sub>S at 900 K. Note that the Gibbs free energies of H<sub>2</sub>, and H<sub>2</sub>S are taken from handbook.<sup>2</sup>

| TM <sub>1</sub> -S <sub>4</sub> /edge | $\Delta G$ /eV |
|---------------------------------------|----------------|
| Ir                                    | 1.70           |
| Rh                                    | 1.19           |
| Os                                    | 2.14           |
| Ru                                    | 1.71           |

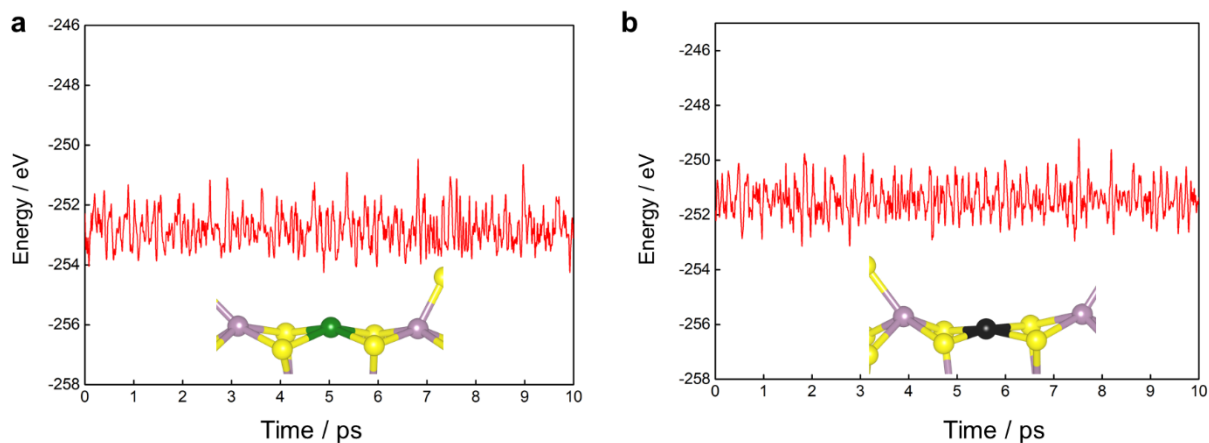

**Fig. S4.** AIMD simulation of (a) Sc<sub>1</sub>-S<sub>4</sub>/edge and (b) Pt<sub>1</sub>-S<sub>4</sub>/edge catalysts at the temperature of 900 K.

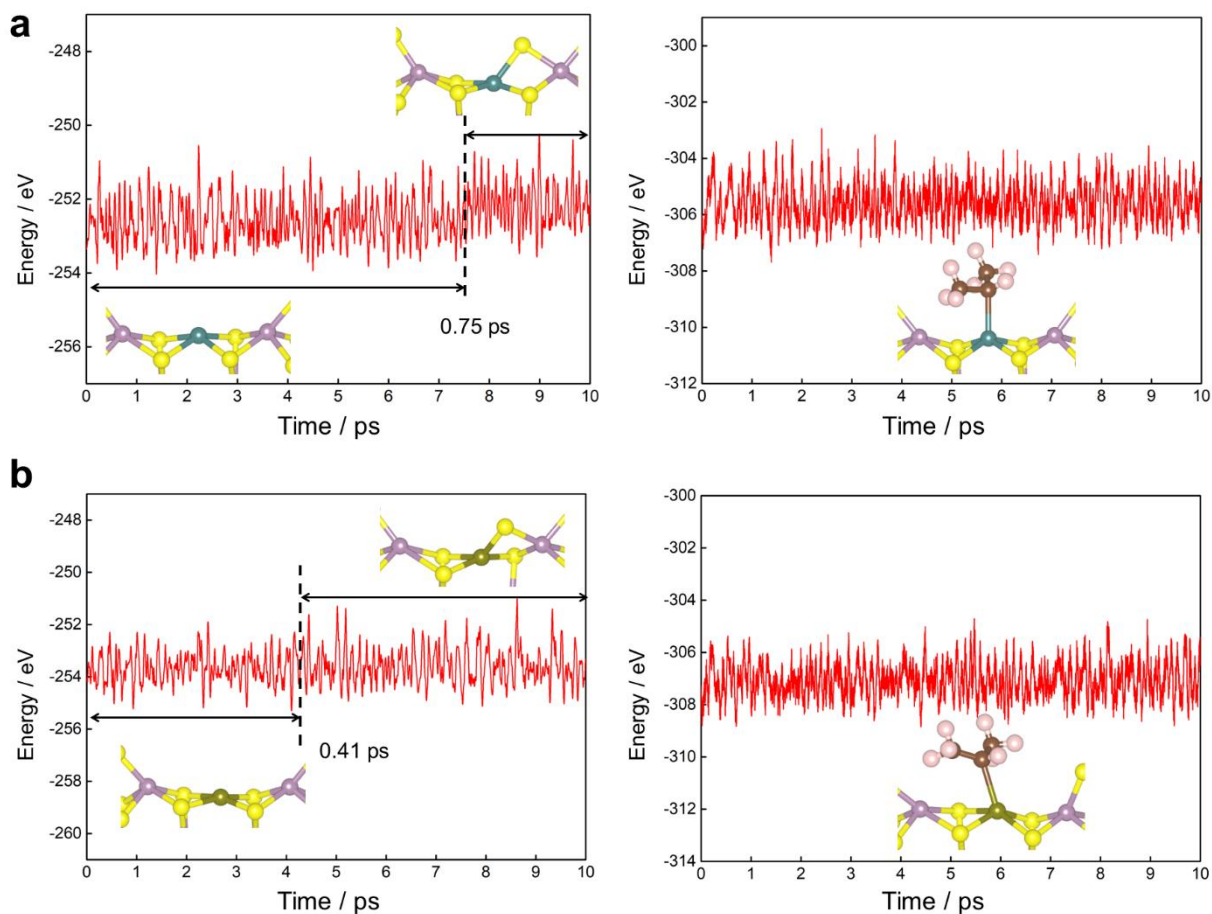

**Fig. S5.** AIMD simulations of (a) Rh<sub>1</sub>-S<sub>4</sub>/edge and (b) Ir<sub>1</sub>-S<sub>4</sub>/edge catalysts without or with a propyl adsorbed on the single atom at 900 K.

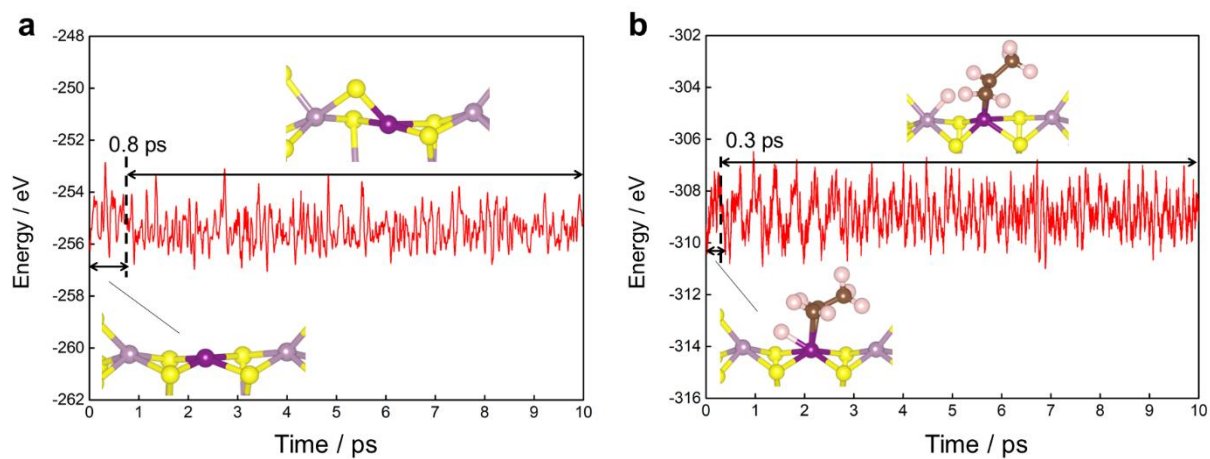

**Fig. S6.** AIMD simulations of  $\text{Os}_1\text{-S}_4/\text{edge}$  catalyst (a) without and (b) with a propyl adsorbed on the Os atom at 900 K.

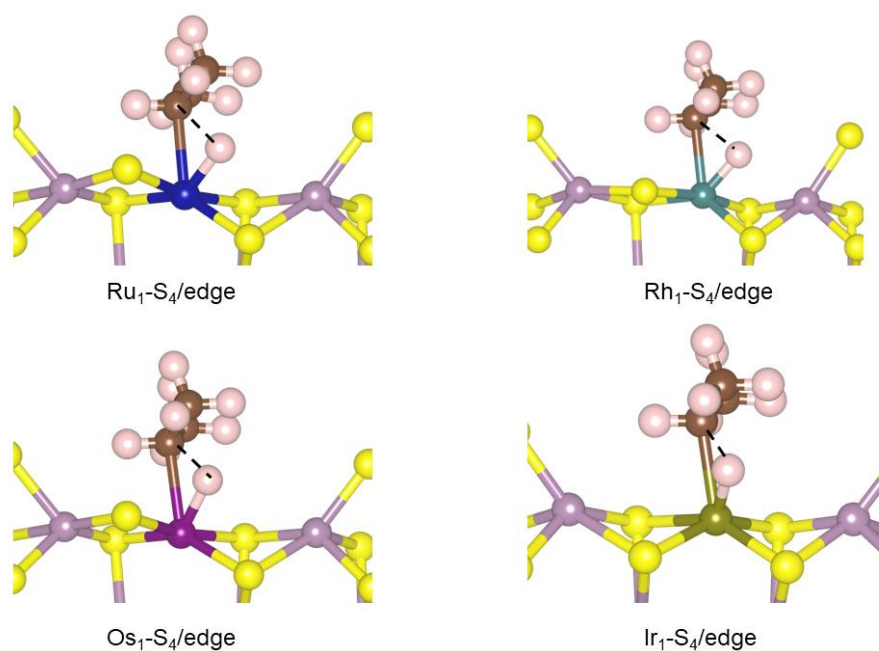

**Fig. S7.** Transition states of first dehydrogenation step on  $\text{TM}_1\text{'-S}_4/\text{edge}$  (TM = Ru, Rh, Os, Ir) catalysts. Note that at the transition state on  $\text{Ir}_1\text{-S}_4/\text{edge}$  catalyst, the two-coordinated S atom returns to its original position.



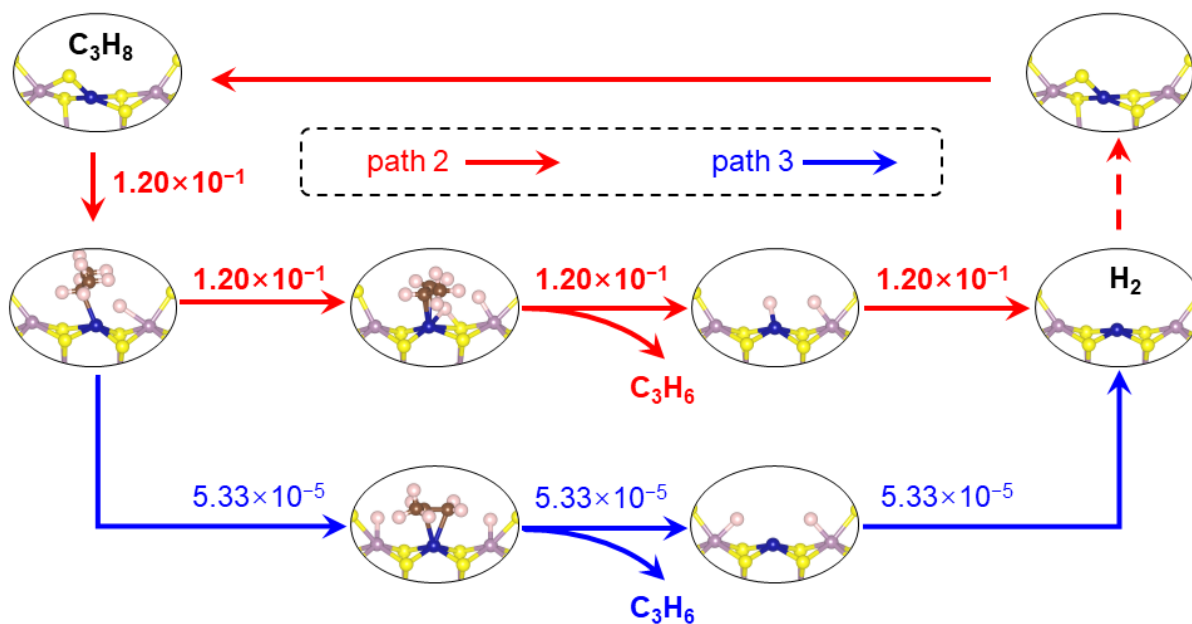

**Fig. S8.** PDH reaction network on the  $\text{Ru}_1\text{'-S}_4/\text{edge}$  catalyst and the TOF ( $\text{s}^{-1}$ ) of each path at steady state. The reaction condition:  $T = 900 \text{ K}$ , the initial partial pressures  $p_{\text{C}_3\text{H}_8} = 0.3 \text{ bar}$  and  $p_{\text{C}_3\text{H}_6} = p_{\text{H}_2} = 0 \text{ bar}$ .<sup>3-6</sup>

**Table S10.** Energy barriers and enthalpy changes of deep dehydrogenations of adsorbed propylene assisted by TM and the unsaturated Mo, respectively, on  $\text{Ru}_1\text{-S}_4/\text{edge}$  catalyst. (unit: eV)

| Ru <sub>1</sub> -S <sub>4</sub> /edge catalyst |      |
|------------------------------------------------|------|
| $E_a$ (assisted by Mo)                         | 1.38 |
| $\Delta H$ (assisted by Mo)                    | 1.38 |
| $E_a$ (assisted by TM)                         | 1.19 |
| $\Delta H$ (assisted by TM)                    | 1.19 |

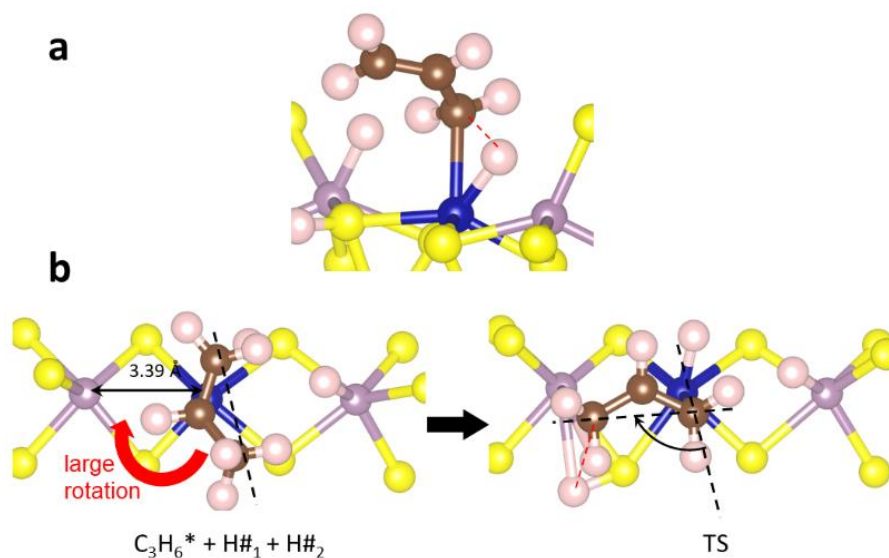

**Fig. S9.** (a) Transition state structures of the dehydrogenation of the methyl of the propylene on the  $\text{Ru}_1\text{-S}_4/\text{edge}$  catalyst.

S<sub>4</sub>/edge catalyst. (b) Initial and transition state structures of the dehydrogenation of the methyl assisted by the unsaturated Mo atom requiring a large angle of rotation for the adsorbed propylene on Ru<sub>1</sub>-S<sub>4</sub>/edge catalyst.

## REFERENCES

- (1) C. Kittel. *Introduction to Solid State Physics*, 8th ed.; John Wiley & Sons, Inc.: Hoboken, New Jersey, 2021; pp 50.
- (2) M. W. Chase and N. I. S. Organization, *NIST-JANAF thermochemical tables*, American Chemical Society Washington, DC, 1998.
- (3) R. T. Hannagan, G. Giannakakis, R. Réocreux, J. Schumann, J. Finzel, Y. Wang, A. Michaelides, P. Deslahra, P. Christopher, M. Flytzani-Stephanopoulos, M. Stamatakis and E. C. H. Sykes, *Science*, 2021, 372, 1444-1447.
- (4) C. Dong, Z. Lai and H. Wang, *ACS Catal.*, 2023, **13**, 5529-5537.
- (5) Q. Sun, N. Wang, Q. Fan, L. Zeng, A. Mayoral, S. Miao, R. Yang, Z. Jiang, W. Zhou, J. Zhang, T. Zhang, J. Xu, P. Zhang, J. Cheng, D.-C. Yang, R. Jia, L. Li, Q. Zhang, Y. Wang, O. Terasaki and J. Yu, *Angew. Chem., Int. Ed.*, 2020, **59**, 19450-19459.
- (6) L. Shi, G. M. Deng, W. C. Li, S. Miao, Q. N. Wang, W. P. Zhang and A. H. Lu, *Angew. Chem., Int. Ed.*, 2015, **54**, 13994-13998.
